# Supplementary material
Source: PubMed Central journal article supplement (PMC5360296)

## SUPPLEMENTARY DATA

**Supplementary Figure 1. The *ins2* mutation in Akita mice causes lifelong hyperglycemia, decreased weight gain, and lymphopenia with little effect on T and B cell frequencies or T cell phenotype.** A: Blood glucose readings of young Akita and littermate mice; n=20-29. B: Weight of Akita and littermate mice (n=20-29). C: Cell counts of spleen, pooled peripheral inguinal and brachial lymph nodes (perLN) and mesenteric lymph nodes (MLN); n=7-22. D-E: Frequencies of CD4+ (D) and CD8+ (E) cells; n=5-11. F-G: Frequency of CD44<sup>hi</sup>CD62L<sup>lo</sup> effector memory T cells (F) and CD44<sup>hi</sup>CD62L<sup>hi</sup> central memory T cells (G); n=4-5. H: Frequency of FoxP3+ cells within CD4+ cells; n=5-11. I: Frequency of CD19+ cells; n=5-11. Black circles=B6, white squares=Akita. Student twotailed T test, \*=p<.05, \*\*=p<.01, \*\*\*=p<.001.

SUPPLEMENTARY DATA

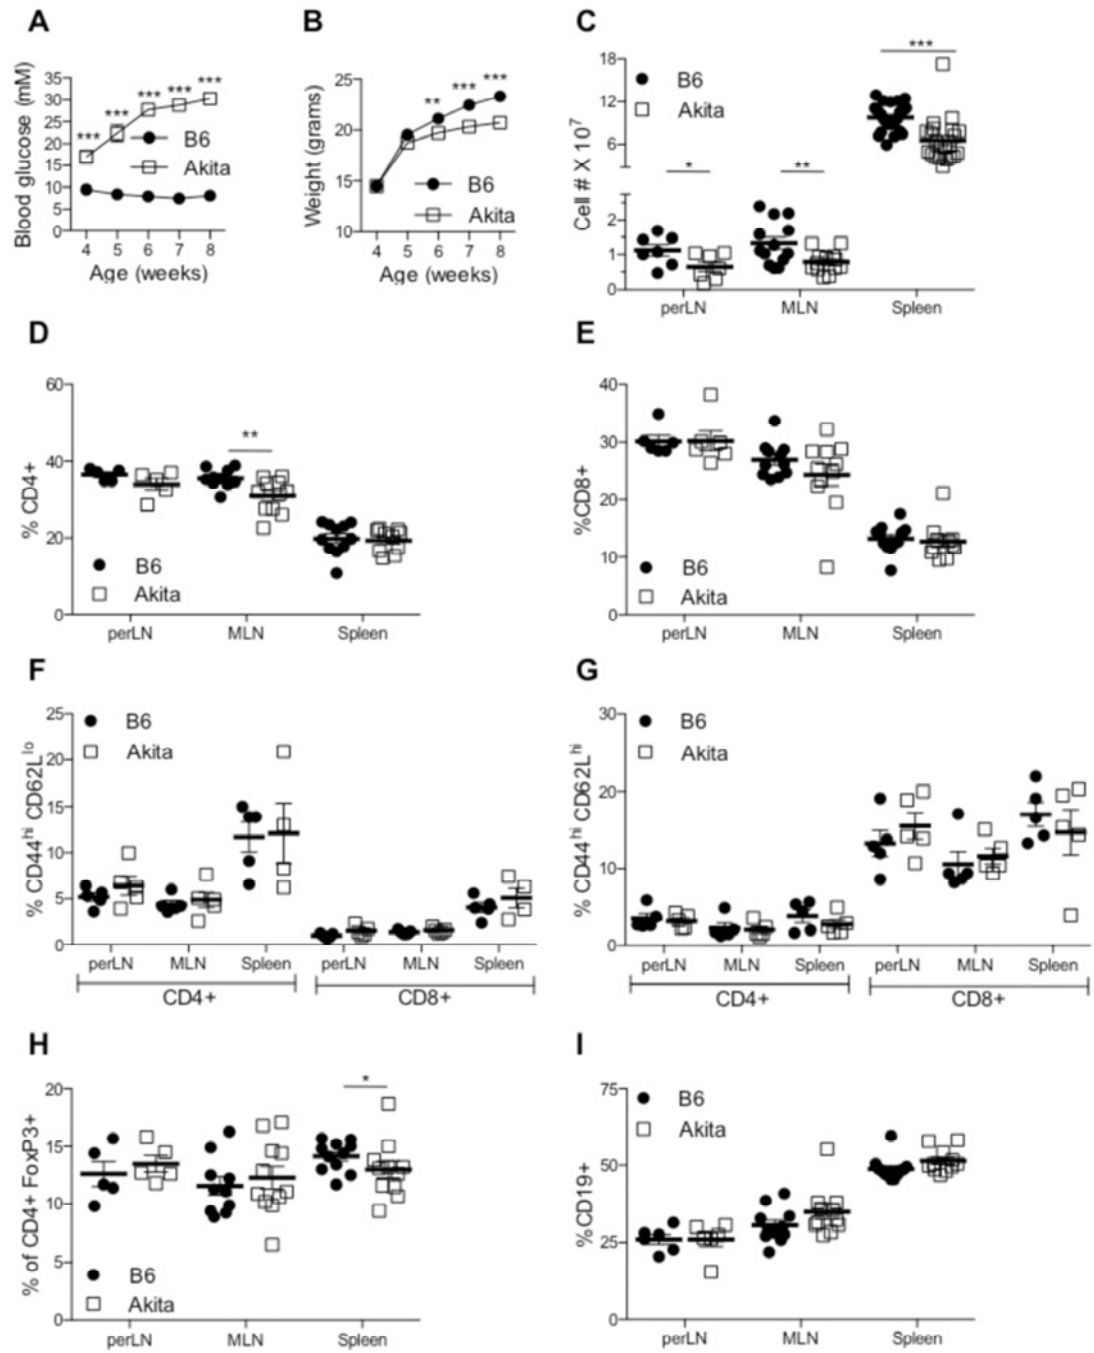

Supplement: DB160218SupplementaryData.pdf [file DB160218SupplementaryData.pdf]
